# Supplementary figures and images for: Plasticity of Mitochondrial DNA Inheritance and Its Impact on Nuclear Gene Transcription in Yeast Hybrids
Source: MDPI journal article supplement (doi:10.3390/microorganisms8040494), 2020-03-31

## A. YPD

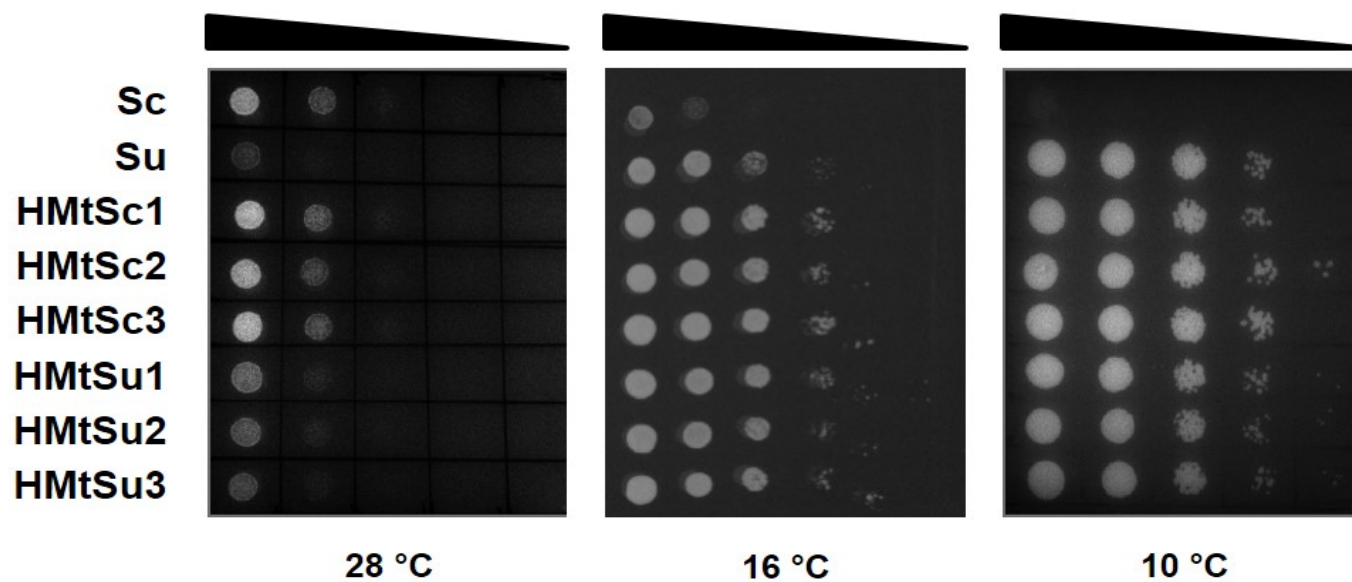

## B. YP + glycerol

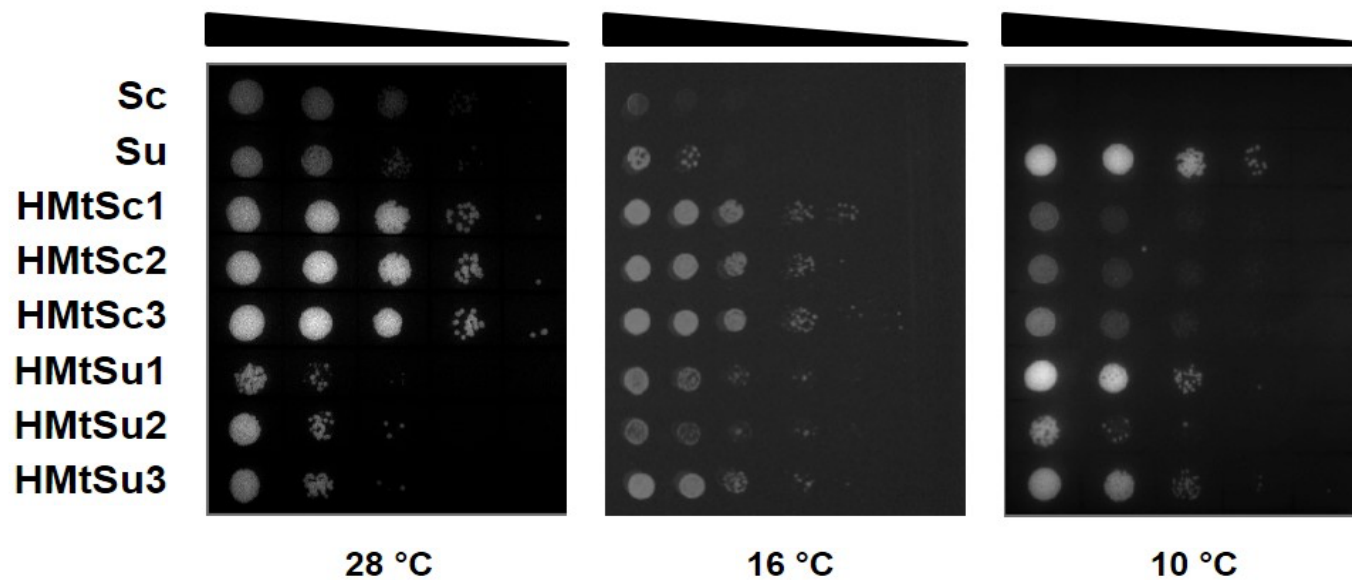

Supplement: s1 [file s1]

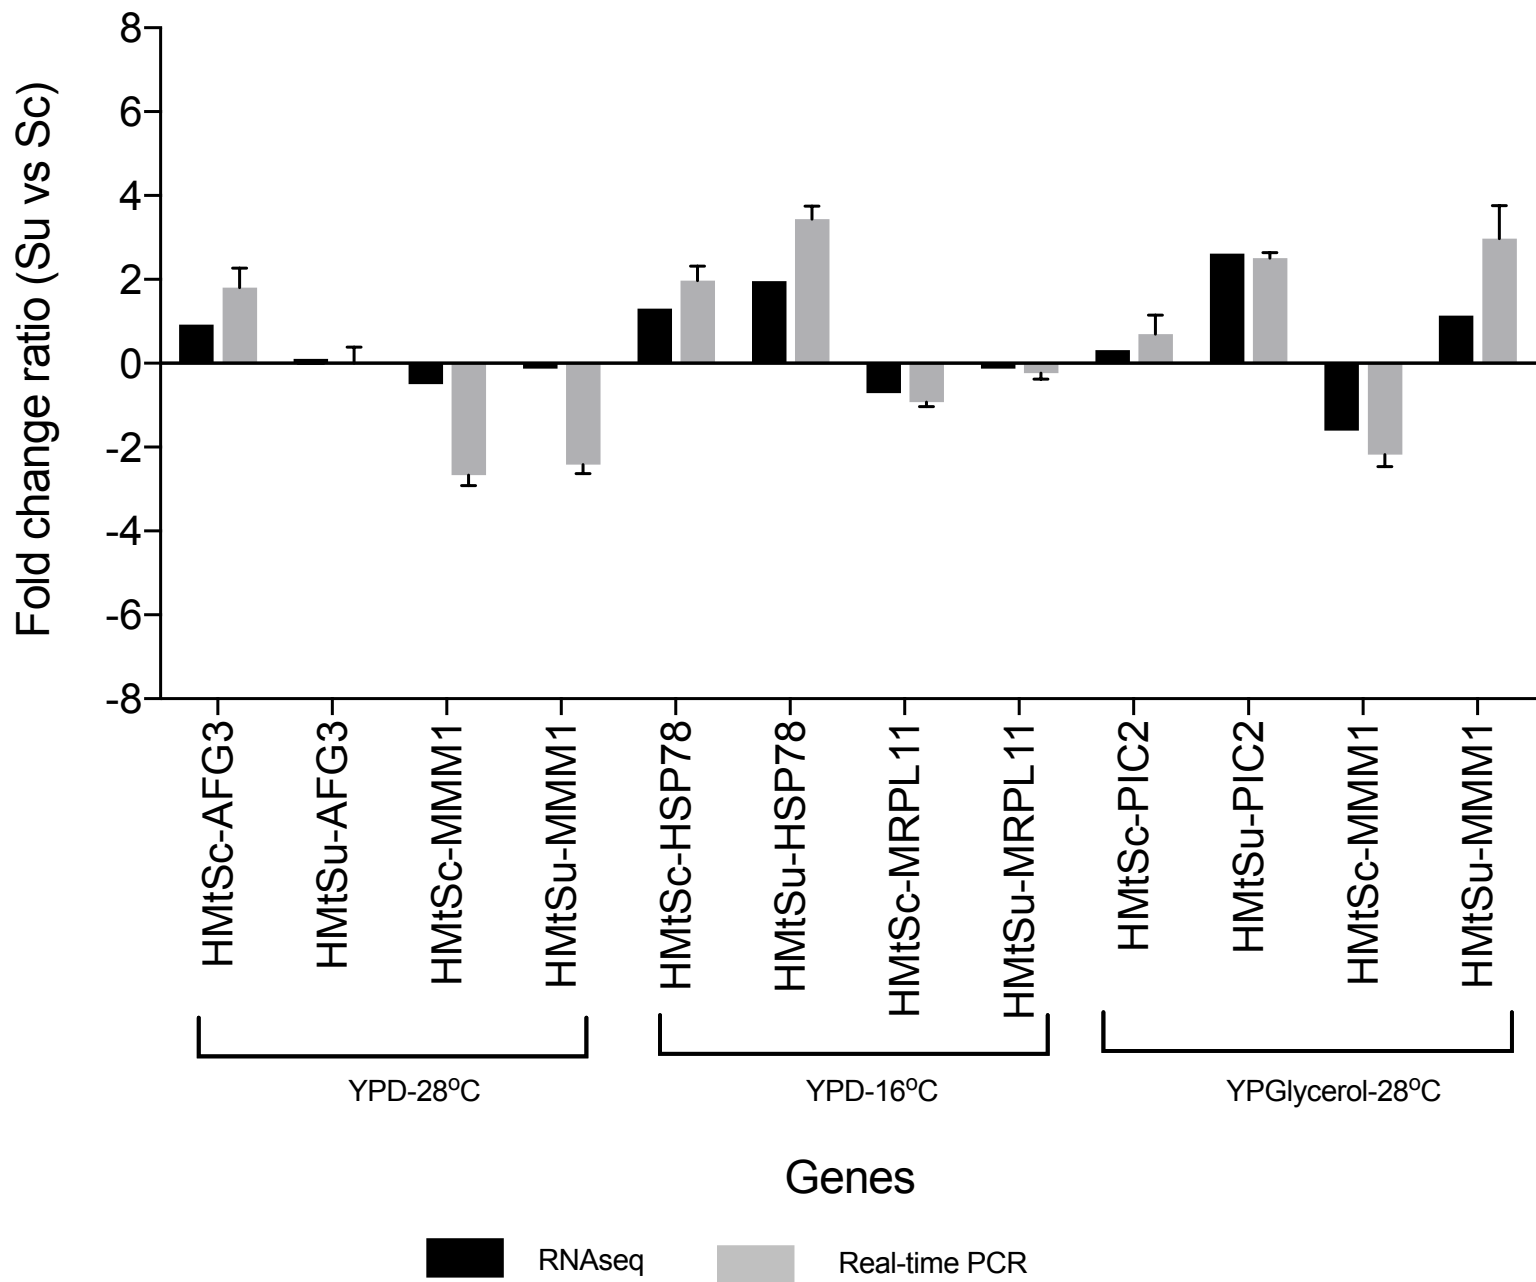

Supplement: s1 [file s1]
